# Supplementary material for: Separation and characterization of KRas proteins and tryptic peptides using enhanced-fluidity liquid chromatography tandem mass spectrometry
Source: Royal Society of Chemistry journal article supplement (doi:10.1039/c9an01454c), 2019-01-01
Supplement: c9an01454c1.pdf [file c9an01454c1.pdf]

**Electronic Supplementary Information For**

**Separation and characterization of KRas protein and tryptic  
peptides using enhanced fluidity liquid chromatography tandem  
mass spectrometry**

Juan Bian and Susan V. Olesik\*

Department of Chemistry and Biochemistry

The Ohio State University

100 West 18th Avenue

Columbus, OH 43210, United States

\*Corresponding author: Phone: (614) 292-0733, Fax: (614) 688-5402,

E-mail: olesik.1@osu.edu

## Peptide Digestion Procedure.

### Reduction of disulfide bonds and alkylation of cysteine residues in protein

1. Conduct buffer exchange of the protein sample solution to 50 mM ammonium bicarbonate (pH 7.8).
2. Add dithiothreitol (DTT) to a final concentration of 5 mM and incubate at 37 °C for 1 hour.
3. Add freshly prepared iodoacetamide (IAA) to a final concentration of 15 mM and incubate at room temperature in the dark for 30 min.

### Digestion of protein and clean up of peptides

1. Add trypsin at a 1:50 ratio trypsin : protein ratio, mix gently and incubate at 55 °C for 4 hours.
2. Clean up peptide sample using C18 solid phase extraction using 0.1% TFA in water as washing solution and 0.1% TFA in water/acetonitrile (40/60) as elution solution.
3. Eluted peptide sample was stored at -20 °C until LC-MS analysis.

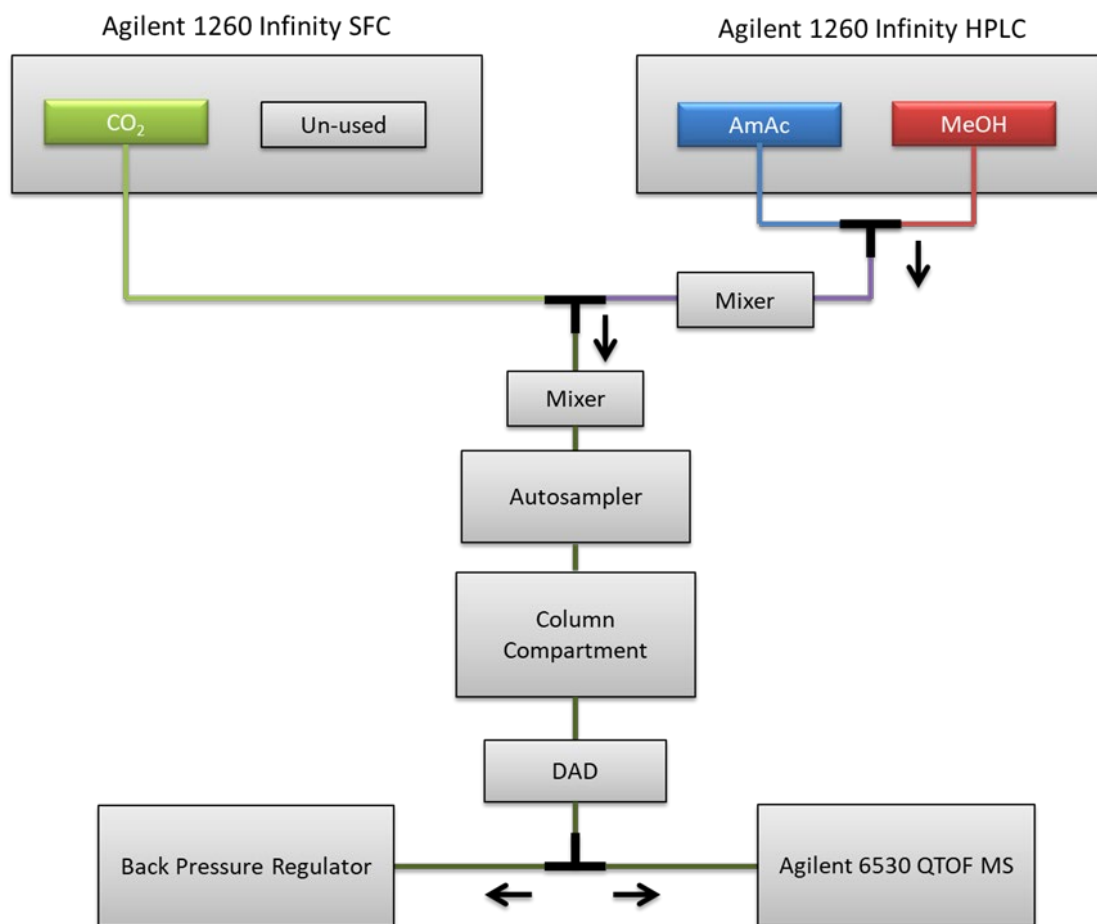

Fig. S1 Instrumentation Setup.

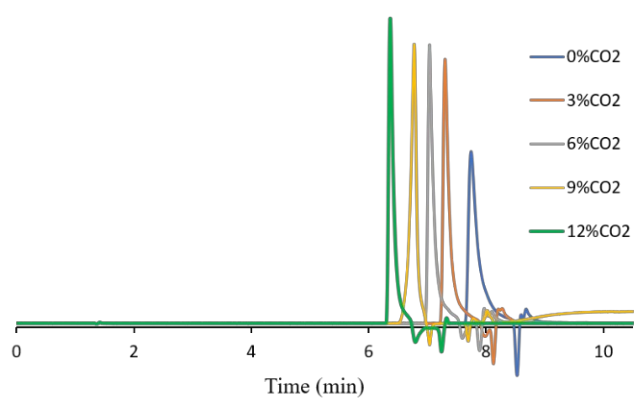

Fig. S2. DAD chromatograms at 280 nm for isocratic elution of myoglobin on XBridge C4 column with addition of liquefied CO<sub>2</sub>. Volume percentage of CO<sub>2</sub> in H<sub>2</sub>O/MeOH (40:60) solvent system: (blue —) 0%, (orange —) 3%, (grey —) 6%, (yellow —) 9%, (green —) 12%.
